# Supplementary material
Source: publisher figshare collection journal article supplement (https://acs.figshare.com/ndownloader/files/5837193)
Supplement: Supplementary file 1 [file 5837193]

# DNA Binding Properties of Oligodeoxynucleotides Containing Pyrrolidino C-nucleosides

## Supporting Information

Adrian Häberli, Christian J. Leumann

### Synthesis of oligonucleotides

All oligomers were synthesized on the 1.3  $\mu\text{m}$  scale on a *Pharmacia LKB Gene Assembler Special DNA synthesizer* using standard phosphoramidite chemistry. Deoxy-pseudouridine phosphoramidite was from Glen. The pyrrolidino phosphoramidites were prepared as described in Ref. 5. As starting units, commercially available natural nucleosides bound to CPG-solid support were chosen. The standard synthetic procedure was used. Coupling efficiencies were > 97 % as determined by trityl assay, both with tetrazole (0.4 Min  $\text{CH}_3\text{CN}$ ) and *S*-benzylthiotetrazole (0.25 M in  $\text{CH}_3\text{CN}$ ) as activator. The oligonucleotides were then cleaved from the solid support and deprotected in conc. aq. ammonia at rt. All strands were purified by ion exchange-HPLC (DEAE-HPLC) and obtained in yields of 17 to 42% ( $\text{OD}^{260\text{nm}}$ ) after desalting on *Sep-Pak* cartridges. The purity of the oligomers was confirmed to be > 95 % by RP-HPLC, and their structural integrity, especially the cleavage of the Fmoc- and benzoyl-protecting groups, was proven by negative electrospray mass spectrometry analysis. The difference between the calculated and the measured mass was always lower than 0.05 %. Table 1 summarizes synthesis and analytical data of all modified oligonucleotides **1-6**.

**UV-melting curves** were carried out on a *Varian Cary 3E* UV/Vis spectrophotometer. Absorbances were monitored at 260 nm and the heating rate was set to 0.5°C/min. A heating-cooling-heating cycle in the temperature range 20-90°C or 0-90°C was applied. The absorbance melting curves were smoothed and the first derivative curves obtained using the *Varian WinUV* software. For temperatures < 20°C, nitrogen was passed through the spectrophotometer to avoid condensation on the cuvettes. To avoid evaporation of the solutions, 6-8 drops of dimethylpolysiloxane were added at the top of the samples in the cell.

Table 1.

| <b>TFO</b>       | <b>Yield<sup>a</sup></b><br><i>OD<sub>260 nm</sub></i> | <b>ESI-MS<sup>b</sup></b><br><i>m/z found.</i><br><i>m/z calc.</i> | <b>DEAE-HPLC<sup>c</sup></b><br><i>method</i><br><i>t<sub>R</sub> [min]</i> | <b>RP-HPLC<sup>d</sup></b><br><i>method</i><br><i>t<sub>R</sub> [min]</i> | <b>Deprotection<sup>e</sup></b><br><i>temp. [°C]</i><br><i>time [h]</i> |
|------------------|--------------------------------------------------------|--------------------------------------------------------------------|-----------------------------------------------------------------------------|---------------------------------------------------------------------------|-------------------------------------------------------------------------|
| <b>1, X=dpψU</b> | 27.8                                                   | 4409.4<br>4410.9                                                   | DEAE3<br>23.5                                                               | RP2<br>25.5                                                               | rt<br>18                                                                |
| <b>4, X=dpψU</b> | 25.8                                                   | 4395.6<br>4395.9                                                   | DEAE2<br>26.4                                                               | RP2<br>17.4                                                               | rt<br>18                                                                |
| <b>5, X=dpψU</b> | 27.6                                                   | 4395.8<br>4395.9                                                   | DEAE2<br>22.2                                                               | RP2<br>17.3                                                               | rt<br>18                                                                |
| <b>6, X=dpψU</b> | 31.3                                                   | 4350.0<br>4350.9                                                   | DEAE1<br>24.0                                                               | RP1<br>23.2                                                               | rt<br>40                                                                |
| <b>2, X=dpψU</b> | 42.5                                                   | 4410.6<br>4410.9                                                   | DEAE3<br>19.2                                                               | RP2<br>19.6                                                               | rt<br>18                                                                |
| <b>3, X=dpψU</b> | 22.9                                                   | 4410.6<br>4410.9                                                   | DEAE3<br>19.6                                                               | RP2<br>19.8                                                               | rt<br>18                                                                |
| <b>1, X=dpψT</b> | 23.2                                                   | 4424.6<br>4424.9                                                   | DEAE3<br>21.1                                                               | RP2<br>20.0                                                               | rt<br>18                                                                |
| <b>4, X=dpψT</b> | 17.3                                                   | 4423.5<br>4423.9                                                   | DEAE2<br>24.6                                                               | RP2<br>19.2                                                               | rt<br>18                                                                |
| <b>5, X=dpψT</b> | 22.5                                                   | 4423.6<br>4423.9                                                   | DEAE2<br>22.8                                                               | RP2<br>20.1                                                               | rt<br>18                                                                |
| <b>2, X=dpψT</b> | 28.3                                                   | 4424.5<br>4424.9                                                   | DEAE3<br>21.8                                                               | RP2<br>20.9                                                               | rt<br>18                                                                |
| <b>3, X=dpψT</b> | 27.8                                                   | 4424.6<br>4424.9                                                   | DEAE3<br>21.7                                                               | RP2<br>21.0                                                               | rt<br>18                                                                |
| <b>1, X=dψU</b>  | 23.5                                                   | 4410.3<br>4411.9                                                   | DEAE4<br>22.4                                                               | RP1<br>27.3                                                               | rt<br>18                                                                |
| <b>4, X=dψU</b>  | 31.0                                                   | 4396.5<br>4397.9                                                   | DEAE4<br>22.3                                                               | RP1<br>28.0                                                               | rt<br>18                                                                |
| <b>5, X=dψU</b>  | 21.4                                                   | 4397.6<br>4397.9                                                   | DEAE3<br>23.6                                                               | RP2<br>22.1                                                               | rt<br>18                                                                |
| <b>2, X=dψU</b>  | 20.2                                                   | 4411.9<br>4411.9                                                   | DEAE3<br>21.2                                                               | RP2<br>22.6                                                               | rt<br>18                                                                |
| <b>3, X=dψU</b>  | 22.0                                                   | 4411.6<br>4411.9                                                   | DEAE3<br>21.7                                                               | RP2<br>22.4                                                               | rt<br>18                                                                |

<sup>a</sup> after isolation by DEAE-HPLC<sup>b</sup> the oligonucleotides were dissolved in a 1:1 mixture of MeCN/H<sub>2</sub>O, containing 1 % NEt<sub>3</sub>

<sup>c</sup> ET 125/4 Nucleogen DEAE 60-7, 125 x 4.0 mm (*Macherey-Nagel*); A = 20 mM KH<sub>2</sub>PO<sub>4</sub> in H<sub>2</sub>O/MeCN 4:1, pH 6.0; B = 1 M KCl, 20 mM KH<sub>2</sub>PO<sub>4</sub> in H<sub>2</sub>O/MeCN 4:1, pH 6.0; flow 1 ml/min; detection wavelength: 260 nm; rt  
*methods*: DEAE1: 15-40 % B in 30 min; DEAE2: 22-45 % B in 30 min; DEAE3: 27-50 % B in 30 min; DEAE4: 32-55 % B in 30 min; DEAE5: 40-75 % B in 30 min

- <sup>d</sup> Aquapore RP-300, 7  $\mu\text{m}$ , 220 x 4.6 mm (*Brownlee*); A = 0.1 M triethylammonia acetate in  $\text{H}_2\text{O}$ , pH 7.0; B = 0.1 M triethylammonia acetate in  $\text{H}_2\text{O}/\text{MeCN}$  1:4, pH 7.0; flow 1 ml/min; detection wavelength: 260 nm; rt  
 methods: RP1: 0-20 % B in 30 min; RP2: 5-25 % B in 30 min
- <sup>e</sup> 25 % aq.  $\text{NH}_3$  soln.

### Determination of the $\text{pK}_a$ of pyrrolidino *C*-nucleoside **2**

To determine the  $\text{pK}_a$  of the free nucleoside, NMR absorptions of **2** in  $\text{D}_2\text{O}$  at different pH values were measured. For this purpose either DCl (20 % in  $\text{D}_2\text{O}$ ) or NaOD (30 % in  $\text{D}_2\text{O}$ ) were added to the NMR solvent. The chemical shift of H-C(5) was plotted against the pH (Figure 2).

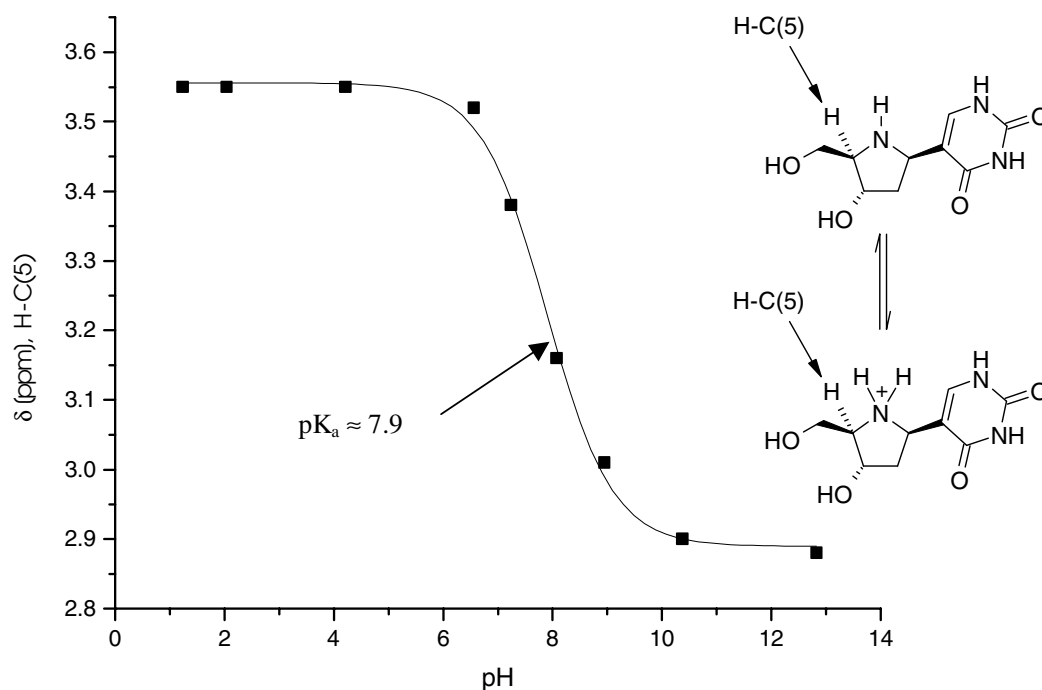

**Figure 2.** Determination of the  $\text{pK}_a$  of dp $\psi$ U. Solvent:  $\text{D}_2\text{O}$ .
